# Supplementary material for: Trypanosoma cruzi Binds to Cytokeratin through Conserved Peptide Motifs Found in the Laminin-G-Like Domain of the gp85/Trans-sialidase Proteins
Source: PubMed Central journal article supplement (PMC4580646; doi:10.1371/journal.pntd.0004099), 2015-09-23
Supplement: pntd.0004099.s002.pdf [file pntd.0004099.s002.pdf]

**Supplementary Table II – Hydrophobicity, pI and average charge of peptides at pH**

**7.4.** The free energy of transfer from aqueous to apolar media was calculated according to the scale proposed by WIMLEY; WHITE (1996). Average charge in physiological pH and pI was calculated using the ideal model as described in TEIXEIRA; LUND; DA SILVA (2010).

| <b>Peptide</b> | <b><math>\Delta G_{\text{Hydrophobicity}}</math><br/>(kcal/mol)</b> | <b>pI</b> | <b>Average charge in<br/>pH 7,4</b> |
|----------------|---------------------------------------------------------------------|-----------|-------------------------------------|
| <b>TS 1a</b>   | 1.71                                                                | 4.0       | -1.44                               |
| <b>TS 1b</b>   | -0.45                                                               | 5.5       | -0.44                               |
| <b>TS 2</b>    | 0.23                                                                | 10.0      | 1.56                                |
| <b>TS 3</b>    | 1.67                                                                | 4.4       | -1.45                               |
| <b>TS 4</b>    | 1.68                                                                | 11.0      | 2.55                                |
| <b>TS 5</b>    | -1.82                                                               | 5.8       | -0.45                               |
| <b>TS 6</b>    | -1.20                                                               | 5.1       | -1.37                               |
| <b>TS 7</b>    | 3.57                                                                | 4.5       | -1.44                               |
| <b>TS 8</b>    | -0.09                                                               | 5.2       | -0.44                               |
| <b>TS 9</b>    | -1.28                                                               | 5.5       | -0.44                               |
| <b>TS 10</b>   | 2.12                                                                | 6.0       | -0.45                               |
| <b>FLY</b>     | -0.18                                                               | 8.7       | 0.55                                |

TEIXEIRA, A. A. R.; LUND, M.; DA SILVA, F. L. B. Fast Proton Titration Scheme for Multiscale Modeling of Protein Solutions. **J. Chem. Theory Comput.**, v. 6, n. 10, p. 3259–3266, 2010.

WIMLEY, W. C.; WHITE, S. H. Experimentally determined hydrophobicity scale for proteins at membrane interfaces. **Nature structural biology**, v. 3, n. 10, p. 842–848, out. 1996.
