# Supplementary material for: Trypanosoma cruzi Binds to Cytokeratin through Conserved Peptide Motifs Found in the Laminin-G-Like Domain of the gp85/Trans-sialidase Proteins
Source: PubMed Central journal article supplement (PMC4580646; doi:10.1371/journal.pntd.0004099), 2015-09-23
Supplement: pntd.0004099.s003.pdf [file pntd.0004099.s003.pdf]

**Supplementary Table III.** Proteins identified by affinity chromatography and mass spectrometry as possible ligands for peptide TS9. The proteins identified in each gel fragment (a, b, c and d) are shown. The table includes the score generated by the protein identification software (Mascot)(higher numbers indicate optimum separation of signal peaks from noise peaks and therefore higher confidence), gene name, protein name and annotated protein molecular mass.

**a** Apparent Mass = 49 kDa

| Score | Gene Name | Name                            | Mass (kDa) |
|-------|-----------|---------------------------------|------------|
| 809   | KRT18     | Keratin, type I cytoskeletal 18 | 48         |
| 535   | ACTB      | Actin, cytoplasmic 1            | 42         |
| 534   | KRT8      | Keratin, type II cytoskeletal 8 | 54         |

**b** Apparent Mass = 53 kDa

| Score | Gene Name | Name                            | Mass (kDa) |
|-------|-----------|---------------------------------|------------|
| 723   | KRT8      | Keratin, type II cytoskeletal 8 | 54         |
| 377   | EEF1A1    | Elongation factor 1-alpha 1     | 50         |

**c** Apparent Mass = 59 kDa

| Score | Gene Name | Name                                      | Mass (kDa) |
|-------|-----------|-------------------------------------------|------------|
| 451   | KRT1      | Keratin, type II cytoskeletal 1           | 65         |
| 439   | TUBB      | Tubulin beta chain                        | 50         |
| 404   | ATP5A1    | ATP synthase subunit alpha, mitochondrial | 60         |

**d** Apparent Mass = 66 kDa

| Score | Gene Name | Name                            | Mass (kDa) |
|-------|-----------|---------------------------------|------------|
| 683   | HSP90AB1  | Heat shock protein HSP 90-beta  | 83*        |
| 510   | HSP90AA1  | Heat shock protein HSP 90-alpha | 85         |

\* The proteins also has 68 kDa isoform annotated (uniprot entry Q58FF7)
